# Supplementary material for: Fruit Peel Powder as Natural Antioxidant and Reinforcing Bio-Filler in Natural Rubber Latex Gloves: Cases of Mangosteen, Pomelo and Durian
Source: MDPI journal article supplement (doi:10.3390/antiox12051119), 2023-05-18
Supplement: s1 [file s1]

## Fruit Peel Powder as Natural Antioxidant and Reinforcing Bio-Filler in Natural Rubber Latex Gloves: Cases of Mangosteen, Pomelo and Durian

Arkarapol Thumwong <sup>1,2</sup>, Jitsuna Darachai <sup>2</sup>, Nuatawan Thamrongsiripak <sup>3</sup>, Shinji Tokonami <sup>4</sup>, Tetsuo Ishikawa <sup>5</sup> and Kiadtisak Saenboonruang <sup>2,6,7,8,\*</sup>

<sup>1</sup> Department of Materials Science, Faculty of Science, Kasetsart University, Bangkok 10900, Thailand; arkarapol.th@ku.th

<sup>2</sup> Special Research Unit of Radiation Technology for Advanced Materials (RTAM), Faculty of Science, Kasetsart University, Bangkok 10900, Thailand; jitsuna.d@ku.th

<sup>3</sup> Thailand Institute of Nuclear Technology (Public Organization), Nakhorn Nayok 26120, Thailand; nuatawan@tint.or.th

<sup>4</sup> Institute of Radiation Emergency Medicine, Hirosaki University, Aomori 0368564, Japan; tokonami@hirosaki-u.ac.jp

<sup>5</sup> Department of Radiation Physics and Chemistry, Fukushima Medical University, Fukushima 9601295, Japan; isikawat@fmu.ac.jp

<sup>6</sup> Department of Applied Radiation and Isotopes, Faculty of Science, Kasetsart University, Bangkok 10900, Thailand

<sup>7</sup> Kasetsart University Research and Development Institute, Kasetsart University, Bangkok 10900, Thailand

<sup>8</sup> Specialized Center of Rubber and Polymer Materials in Agriculture and Industry (RPM), Faculty of Science, Kasetsart University, Bangkok 10900, Thailand

\* Correspondence: kiadtisak.s@ku.th; Tel.: +66-2562-5555 (ext. 646219)

**Table S1.** Statistical results based on the t-test for the determination of radical scavenging effects (RSEs) of extracts from MPP, PPP, and DPP with varying extract concentrations. The values are shown as t(degrees of freedom) = t-value; p < p-value.

|     | MPP                      | PPP                       | DPP                       |
|-----|--------------------------|---------------------------|---------------------------|
| MPP | –                        | t(3) = -38.61; p < 0.0001 | t(3) = -64.95; p < 0.0001 |
| PPP | t(3) = 38.61; p < 0.0001 | –                         | t(3) = -77.28; p < 0.0001 |
| DPP | t(3) = 64.95; p < 0.0001 | t(3) = 77.28; p < 0.0001  | –                         |

**Table S2.** Statistical results based on the t-test for the determination of  $L^*$  parameter for NRL gloves containing varying contents of MPP, PPP, and DPP. The values are shown as t(degrees of freedom) = t-value;  $p < p$ -value.

|                    | Pristine NR                      | 2-phr MPP                       | 4-phr MPP                        | 6-phr MPP                       | 2-phr PPP                       | 4-phr PPP                        | 6-phr PPP                        | 2-phr DPP                       | 4-phr DPP                       | 6-phr DPP                        |
|--------------------|----------------------------------|---------------------------------|----------------------------------|---------------------------------|---------------------------------|----------------------------------|----------------------------------|---------------------------------|---------------------------------|----------------------------------|
| <b>Pristine NR</b> | –                                | t(3) = 1084.11;<br>$p < 0.0001$ | t(3) = 944.86;<br>$p < 0.0001$   | t(3) = 668.20;<br>$p < 0.0001$  | t(3) = 56.56;<br>$p < 0.0002$   | t(3) = 146.48;<br>$p < 0.0001$   | t(3) = 148.46;<br>$p < 0.0001$   | t(3) = 486.00;<br>$p < 0.0001$  | t(3) = 133.95;<br>$p < 0.0001$  | t(3) = 257.79;<br>$p < 0.0001$   |
| <b>2-phr MPP</b>   | t(3) = -1084.11;<br>$p < 0.0001$ | –                               | t(3) = 622.13;<br>$p < 0.0001$   | t(3) = 438.12;<br>$p < 0.0001$  | t(3) = -162.94;<br>$p < 0.0001$ | t(3) = -402.15;<br>$p < 0.0001$  | t(3) = -561.92;<br>$p < 0.0001$  | t(3) = -506.62;<br>$p < 0.0001$ | t(3) = -132.18;<br>$p < 0.0001$ | t(3) = -366.53;<br>$p < 0.0001$  |
| <b>4-phr MPP</b>   | t(3) = -944.86;<br>$p < 0.0001$  | t(3) = -622.13;<br>$p < 0.0001$ | –                                | t(3) = 370.12;<br>$p < 0.0001$  | t(3) = -272.16;<br>$p < 0.0001$ | t(3) = -914.30;<br>$p < 0.0001$  | t(3) = -1461.85;<br>$p < 0.0001$ | t(3) = -540.50;<br>$p < 0.0001$ | t(3) = -275.69;<br>$p < 0.0001$ | t(3) = 1091.37;<br>$p < 0.0001$  |
| <b>6-phr MPP</b>   | t(3) = -668.20;<br>$p < 0.0001$  | t(3) = -438.12;<br>$p < 0.0001$ | t(3) = -370.12;<br>$p < 0.0001$  | –                               | t(3) = -664.98;<br>$p < 0.0001$ | t(3) = -3753.50;<br>$p < 0.0001$ | t(3) = -1933.25;<br>$p < 0.0001$ | t(3) = -470.16;<br>$p < 0.0001$ | t(3) = -928.43;<br>$p < 0.0001$ | t(3) = -1831.62;<br>$p < 0.0001$ |
| <b>2-phr PPP</b>   | t(3) = -56.56;<br>$p < 0.0002$   | t(3) = 162.94;<br>$p < 0.0001$  | t(3) = 272.16;<br>$p < 0.0001$   | t(3) = 664.98;<br>$p < 0.0001$  | –                               | t(3) = 24.22;<br>$p < 0.0008$    | t(3) = 6.81;<br>$p < 0.0104$     | t(3) = -0.53;<br>$p < 0.3248$   | t(3) = -214.73;<br>$p < 0.0001$ | t(3) = -80.29;<br>$p < 0.0001$   |
| <b>4-phr PPP</b>   | t(3) = -146.48;<br>$p < 0.0001$  | t(3) = 402.15;<br>$p < 0.0001$  | t(3) = 914.30;<br>$p < 0.0001$   | t(3) = 3753.50;<br>$p < 0.0001$ | t(3) = -24.22;<br>$p < 0.0008$  | –                                | t(3) = -113.00;<br>$p < 0.0001$  | t(3) = 21.49;<br>$p < 0.0011$   | t(3) = -116.39;<br>$p < 0.0001$ | t(3) = -521.35;<br>$p < 0.0001$  |
| <b>6-phr PPP</b>   | t(3) = -148.46;<br>$p < 0.0001$  | t(3) = 561.92;<br>$p < 0.0001$  | t(3) = 1461.85;<br>$p < 0.0001$  | t(3) = 1933.25;<br>$p < 0.0001$ | t(3) = -6.81;<br>$p < 0.0104$   | t(3) = 113.00;<br>$p < 0.0001$   | –                                | t(3) = 7.08;<br>$p < 0.0097$    | t(3) = -118.20;<br>$p < 0.0001$ | t(3) = -1129.00;<br>$p < 0.0001$ |
| <b>2-phr DPP</b>   | t(3) = -486.00;<br>$p < 0.0001$  | t(3) = 506.62;<br>$p < 0.0001$  | t(3) = 540.50;<br>$p < 0.0001$   | t(3) = 470.16;<br>$p < 0.0001$  | t(3) = 0.53;<br>$p < 0.3248$    | t(3) = -21.49;<br>$p < 0.0011$   | t(3) = -7.08;<br>$p < 0.0097$    | –                               | t(3) = 56.59; $p < 0.0002$      | t(3) = 93.37;<br>$p < 0.0001$    |
| <b>4-phr DPP</b>   | t(3) = -133.95;<br>$p < 0.0001$  | t(3) = 132.18;<br>$p < 0.0001$  | t(3) = 275.69;<br>$p < 0.0001$   | t(3) = 928.43;<br>$p < 0.0001$  | t(3) = 214.73;<br>$p < 0.0001$  | t(3) = 116.39;<br>$p < 0.0001$   | t(3) = 118.20;<br>$p < 0.0001$   | t(3) = -56.59;<br>$p < 0.0002$  | –                               | t(3) = -10.10;<br>$p < 0.0048$   |
| <b>6-phr DPP</b>   | t(3) = -257.79;<br>$p < 0.0001$  | t(3) = 366.53;<br>$p < 0.0001$  | t(3) = -1091.37;<br>$p < 0.0001$ | t(3) = 1831.62;<br>$p < 0.0001$ | t(3) = 80.29;<br>$p < 0.0001$   | t(3) = 521.35;<br>$p < 0.0001$   | t(3) = 1129.00;<br>$p < 0.0001$  | t(3) = -93.37;<br>$p < 0.0001$  | t(3) = 10.10;<br>$p < 0.0048$   | –                                |

**Table S3.** Statistical results based on the t-test for the determination of  $a^*$  parameter for NRL gloves containing varying contents of MPP, PPP, and DPP. The values are shown as t(degrees of freedom) = t-value;  $p < p$ -value.

|                    | Pristine NR                     | 2-phr MPP                        | 4-phr MPP                        | 6-phr MPP                        | 2-phr PPP                       | 4-phr PPP                       | 6-phr PPP                       | 2-phr DPP                      | 4-phr DPP                       | 6-phr DPP                       |
|--------------------|---------------------------------|----------------------------------|----------------------------------|----------------------------------|---------------------------------|---------------------------------|---------------------------------|--------------------------------|---------------------------------|---------------------------------|
| <b>Pristine NR</b> | –                               | t(3) = -831.00;<br>$p < 0.0001$  | t(3) = -2183.31;<br>$p < 0.0001$ | t(3) = -872.52;<br>$p < 0.0001$  | t(3) = -58.00;<br>$p < 0.0001$  | t(3) = -52.00;<br>$p < 0.0002$  | t(3) = -15.50;<br>$p < 0.0021$  | t(3) = -58.01;<br>$p < 0.0001$ | t(3) = -398.00;<br>$p < 0.0001$ | t(3) = -319.38;<br>$p < 0.0001$ |
| <b>2-phr MPP</b>   | t(3) = 831.00;<br>$p < 0.0001$  | –                                | t(3) = 831.00;<br>$p < 0.0001$   | t(3) = 775.11;<br>$p < 0.0001$   | t(3) = 898.42;<br>$p < 0.0001$  | t(3) = 922.61;<br>$p < 0.0001$  | t(3) = 399.65;<br>$p < 0.0001$  | t(3) = 300.92;<br>$p < 0.0001$ | t(3) = 389.32;<br>$p < 0.0001$  | t(3) = 1648.00;<br>$p < 0.0001$ |
| <b>4-phr MPP</b>   | t(3) = 2183.31;<br>$p < 0.0001$ | t(3) = -831.00;<br>$p < 0.0001$  | –                                | t(3) = -433.59;<br>$p < 0.0001$  | t(3) = 3676.00;<br>$p < 0.0001$ | t(3) = 3740.00;<br>$p < 0.0001$ | t(3) = 669.93;<br>$p < 0.0001$  | t(3) = 623.05;<br>$p < 0.0001$ | t(3) = 1132.38;<br>$p < 0.0001$ | t(3) = 2947.00;<br>$p < 0.0001$ |
| <b>6-phr MPP</b>   | t(3) = 872.52;<br>$p < 0.0001$  | t(3) = -775.11;<br>$p < 0.0001$  | t(3) = 433.59;<br>$p < 0.0001$   | –                                | t(3) = 1120.48;<br>$p < 0.0001$ | t(3) = 985.24;<br>$p < 0.0001$  | t(3) = 565.34;<br>$p < 0.0001$  | t(3) = 699.05;<br>$p < 0.0001$ | t(3) = 727.91;<br>$p < 0.0001$  | t(3) = 1192.96;<br>$p < 0.0001$ |
| <b>2-phr PPP</b>   | t(3) = 58.00;<br>$p < 0.0001$   | t(3) = -898.42;<br>$p < 0.0001$  | t(3) = -3676.00;<br>$p < 0.0001$ | t(3) = -1120.48;<br>$p < 0.0001$ | –                               | t(3) = 64.00;<br>$p < 0.0008$   | t(3) = 9.00;<br>$p < 0.0061$    | t(3) = 45.17;<br>$p < 0.0002$  | t(3) = 340.00;<br>$p < 0.0001$  | t(3) = 420.89;<br>$p < 0.0001$  |
| <b>4-phr PPP</b>   | t(3) = 52.00;<br>$p < 0.0002$   | t(3) = -922.61;<br>$p < 0.0001$  | t(3) = -3740.00;<br>$p < 0.0001$ | t(3) = -985.24;<br>$p < 0.0001$  | t(3) = -64.00;<br>$p < 0.0008$  | –                               | t(3) = -2.00;<br>$p < 0.0918$   | t(3) = 54.20;<br>$p < 0.0002$  | t(3) = 429.55;<br>$p < 0.0001$  | t(3) = 396.50;<br>$p < 0.0001$  |
| <b>6-phr PPP</b>   | t(3) = 15.50;<br>$p < 0.0021$   | t(3) = -399.65;<br>$p < 0.0001$  | t(3) = -669.93;<br>$p < 0.0001$  | t(3) = -565.34;<br>$p < 0.0001$  | t(3) = -9.00;<br>$p < 0.0061$   | t(3) = 2.00;<br>$p < 0.0918$    | –                               | t(3) = 30.14;<br>$p < 0.0005$  | t(3) = 138.71;<br>$p < 0.0001$  | t(3) = 125.38;<br>$p < 0.0001$  |
| <b>2-phr DPP</b>   | t(3) = 58.01;<br>$p < 0.0001$   | t(3) = -300.92;<br>$p < 0.0001$  | t(3) = -623.05;<br>$p < 0.0001$  | t(3) = -699.05;<br>$p < 0.0001$  | t(3) = -45.17;<br>$p < 0.0002$  | t(3) = -54.20;<br>$p < 0.0002$  | t(3) = -30.14;<br>$p < 0.0005$  | –                              | t(3) = -131.19;<br>$p < 0.0002$ | t(3) = -83.59;<br>$p < 0.0001$  |
| <b>4-phr DPP</b>   | t(3) = 398.00;<br>$p < 0.0001$  | t(3) = -389.32;<br>$p < 0.0001$  | t(3) = -1132.38;<br>$p < 0.0001$ | t(3) = -727.91;<br>$p < 0.0001$  | t(3) = -340.00;<br>$p < 0.0001$ | t(3) = -429.55;<br>$p < 0.0001$ | t(3) = -30.14;<br>$p < 0.0005$  | t(3) = 131.19;<br>$p < 0.0002$ | –                               | t(3) = -13.59;<br>$p < 0.0027$  |
| <b>6-phr DPP</b>   | t(3) = 319.38;<br>$p < 0.0001$  | t(3) = -1648.00;<br>$p < 0.0001$ | t(3) = -2947.00;<br>$p < 0.0001$ | t(3) = -1192.96;<br>$p < 0.0001$ | t(3) = -420.89;<br>$p < 0.0001$ | t(3) = -396.50;<br>$p < 0.0001$ | t(3) = -125.38;<br>$p < 0.0001$ | t(3) = 83.59;<br>$p < 0.0001$  | t(3) = 13.59;<br>$p < 0.0027$   | –                               |

**Table S4.** Statistical results based on the t-test for the determination of  $b^*$  parameter for NRL gloves containing varying contents of MPP, PPP, and DPP. The values are shown as t(degrees of freedom) = t-value;  $p < p$ -value.

|                    | Pristine NR                     | 2-phr MPP                        | 4-phr MPP                        | 6-phr MPP                       | 2-phr PPP                        | 4-phr PPP                        | 6-phr PPP                        | 2-phr DPP                       | 4-phr DPP                       | 6-phr DPP                        |
|--------------------|---------------------------------|----------------------------------|----------------------------------|---------------------------------|----------------------------------|----------------------------------|----------------------------------|---------------------------------|---------------------------------|----------------------------------|
| <b>Pristine NR</b> | –                               | t(3) = -1052.04;<br>$p < 0.0001$ | t(3) = -2565.49;<br>$p < 0.0001$ | t(3) = -757.76;<br>$p < 0.0001$ | t(3) = -621.75;<br>$p < 0.0001$  | t(3) = -1389.50;<br>$p < 0.0001$ | t(3) = -1227.25;<br>$p < 0.0001$ | t(3) = -327.62;<br>$p < 0.0001$ | t(3) = -764.20;<br>$p < 0.0001$ | t(3) = -1267.77;<br>$p < 0.0001$ |
| <b>2-phr MPP</b>   | t(3) = 1052.04;<br>$p < 0.0001$ | –                                | t(3) = -743.30;<br>$p < 0.0001$  | t(3) = -304.28;<br>$p < 0.0001$ | t(3) = 751.06;<br>$p < 0.0001$   | t(3) = 463.14;<br>$p < 0.0001$   | t(3) = 425.47;<br>$p < 0.0001$   | t(3) = 724.42;<br>$p < 0.0001$  | t(3) = 309.29;<br>$p < 0.0001$  | t(3) = 233.97;<br>$p < 0.0001$   |
| <b>4-phr MPP</b>   | t(3) = 2565.49;<br>$p < 0.0001$ | t(3) = 743.30;<br>$p < 0.0001$   | –                                | t(3) = -163.89;<br>$p < 0.0001$ | t(3) = 2535.00;<br>$p < 0.0001$  | t(3) = 1245.34;<br>$p < 0.0001$  | t(3) = 1000.50;<br>$p < 0.0001$  | t(3) = 1998.03;<br>$p < 0.0001$ | t(3) = 1025.98;<br>$p < 0.0001$ | t(3) = 935.80;<br>$p < 0.0001$   |
| <b>6-phr MPP</b>   | t(3) = 757.76;<br>$p < 0.0001$  | t(3) = 304.28;<br>$p < 0.0001$   | t(3) = 163.89;<br>$p < 0.0001$   | –                               | t(3) = 786.39;<br>$p < 0.0001$   | t(3) = 587.08;<br>$p < 0.0001$   | t(3) = 467.62;<br>$p < 0.0001$   | t(3) = 942.10;<br>$p < 0.0001$  | t(3) = 732.35;<br>$p < 0.0001$  | t(3) = 566.85;<br>$p < 0.0001$   |
| <b>2-phr PPP</b>   | t(3) = 621.75;<br>$p < 0.0001$  | t(3) = -751.06;<br>$p < 0.0001$  | t(3) = -2535.00;<br>$p < 0.0001$ | t(3) = -786.39;<br>$p < 0.0001$ | –                                | t(3) = -378.00;<br>$p < 0.0001$  | t(3) = -308.31;<br>$p < 0.0001$  | t(3) = 100.25;<br>$p < 0.0001$  | t(3) = 822.45;<br>$p < 0.0001$  | t(3) = 1463.00;<br>$p < 0.0001$  |
| <b>4-phr PPP</b>   | t(3) = 1389.50;<br>$p < 0.0001$ | t(3) = -463.14;<br>$p < 0.0001$  | t(3) = -1245.34;<br>$p < 0.0001$ | t(3) = -587.08;<br>$p < 0.0001$ | t(3) = 378.00;<br>$p < 0.0001$   | –                                | t(3) = -156.00;<br>$p < 0.0001$  | t(3) = -104.71;<br>$p < 0.0001$ | t(3) = 239.05;<br>$p < 0.0001$  | t(3) = 677.31;<br>$p < 0.0001$   |
| <b>6-phr PPP</b>   | t(3) = 1227.25;<br>$p < 0.0001$ | t(3) = -425.47;<br>$p < 0.0001$  | t(3) = -1000.50;<br>$p < 0.0001$ | t(3) = -467.62;<br>$p < 0.0001$ | t(3) = 308.31;<br>$p < 0.0001$   | t(3) = 156.00;<br>$p < 0.0001$   | –                                | t(3) = -135.12;<br>$p < 0.0001$ | t(3) = 79.60;<br>$p < 0.0001$   | t(3) = 237.80;<br>$p < 0.0001$   |
| <b>2-phr DPP</b>   | t(3) = 327.62;<br>$p < 0.0001$  | t(3) = -724.42;<br>$p < 0.0001$  | t(3) = -1998.03;<br>$p < 0.0001$ | t(3) = -942.10;<br>$p < 0.0001$ | t(3) = -100.25;<br>$p < 0.0001$  | t(3) = 104.71;<br>$p < 0.0001$   | t(3) = 135.12;<br>$p < 0.0001$   | –                               | t(3) = -407.21;<br>$p < 0.0001$ | t(3) = -477.18;<br>$p < 0.0001$  |
| <b>4-phr DPP</b>   | t(3) = 764.20;<br>$p < 0.0001$  | t(3) = -309.29;<br>$p < 0.0001$  | t(3) = -1025.98;<br>$p < 0.0001$ | t(3) = -732.35;<br>$p < 0.0001$ | t(3) = -822.45;<br>$p < 0.0001$  | t(3) = -239.05;<br>$p < 0.0001$  | t(3) = -79.60;<br>$p < 0.0001$   | t(3) = 407.21;<br>$p < 0.0001$  | –                               | t(3) = -433.01;<br>$p < 0.0001$  |
| <b>6-phr DPP</b>   | t(3) = 1267.77;<br>$p < 0.0001$ | t(3) = -233.97;<br>$p < 0.0001$  | t(3) = -935.80;<br>$p < 0.0001$  | t(3) = -566.85;<br>$p < 0.0001$ | t(3) = -1463.00;<br>$p < 0.0001$ | t(3) = -677.31;<br>$p < 0.0001$  | t(3) = -237.80;<br>$p < 0.0001$  | t(3) = 477.18;<br>$p < 0.0001$  | t(3) = 433.01;<br>$p < 0.0001$  | –                                |

**Table S5.** Statistical results based on the t-test for the determination of densities for NRL gloves containing varying contents of MPP, PPP, and DPP. The values are shown as t(degrees of freedom) = t-value; p < p-value.

|                    | Pristine NR                | 2-phr MPP                   | 4-phr MPP                   | 6-phr MPP                   | 2-phr PPP                   | 4-phr PPP                   | 6-phr PPP                    | 2-phr DPP                   | 4-phr DPP                   | 6-phr DPP                   |
|--------------------|----------------------------|-----------------------------|-----------------------------|-----------------------------|-----------------------------|-----------------------------|------------------------------|-----------------------------|-----------------------------|-----------------------------|
| <b>Pristine NR</b> | –                          | t(3) = -6.26;<br>p < 0.0123 | t(3) = -7.05;<br>p < 0.0098  | t(3) = -5.51;<br>p < 0.0157 | t(3) = -8.68;<br>p < 0.0065 | t(3) = -9.59;<br>p < 0.0054 |
| <b>2-phr MPP</b>   | t(3) = 6.26;<br>p < 0.0123 | –                           | t(3) = -2.76;<br>p < 0.0551 | t(3) = -1.68;<br>p < 0.1173 | t(3) = 2.87;<br>p < 0.0516  | t(3) = 4.35;<br>p < 0.0245  | t(3) = -1.98;<br>p < 0.0934  | t(3) = 3.67;<br>p < 0.0335  | t(3) = 0.63;<br>p < 0.2957  | t(3) = -2.02;<br>p < 0.0907 |
| <b>4-phr MPP</b>   | t(3) = 6.26;<br>p < 0.0123 | t(3) = 2.76;<br>p < 0.0551  | –                           | t(3) = 0.00;<br>p < 0.5000  | t(3) = 3.50;<br>p < 0.0364  | t(3) = 8.17;<br>p < 0.0073  | t(3) = 2.43;<br>p < 0.0679   | t(3) = 7.45;<br>p < 0.0088  | t(3) = 2.56;<br>p < 0.0623  | t(3) = -0.85;<br>p < 0.2415 |
| <b>6-phr MPP</b>   | t(3) = 6.26;<br>p < 0.0123 | t(3) = 1.68;<br>p < 0.1173  | t(3) = 0.00;<br>p < 0.5000  | –                           | t(3) = 2.24;<br>p < 0.0771  | t(3) = 4.49;<br>p < 0.0231  | t(3) = 1.51;<br>p < 0.1352   | t(3) = 6.86;<br>p < 0.0103  | t(3) = 4.16;<br>p < 0.0266  | t(3) = -5.20;<br>p < 0.0175 |
| <b>2-phr PPP</b>   | t(3) = 6.26;<br>p < 0.0123 | t(3) = -2.87;<br>p < 0.0516 | t(3) = -3.50;<br>p < 0.0364 | t(3) = -2.24;<br>p < 0.0771 | –                           | t(3) = -0.15;<br>p < 0.4464 | t(3) = -2.62;<br>p < 0.0601  | t(3) = 0.46;<br>p < 0.3450  | t(3) = -0.24;<br>p < 0.4148 | t(3) = -2.46;<br>p < 0.0667 |
| <b>4-phr PPP</b>   | t(3) = 6.26;<br>p < 0.0123 | t(3) = -4.35;<br>p < 0.0245 | t(3) = -8.17;<br>p < 0.0073 | t(3) = -4.49;<br>p < 0.0231 | t(3) = 0.15;<br>p < 0.4464  | –                           | t(3) = -34.00;<br>p < 0.0004 | t(3) = 2.29;<br>p < 0.0744  | t(3) = -0.28;<br>p < 0.4041 | t(3) = -4.59;<br>p < 0.0222 |
| <b>6-phr PPP</b>   | t(3) = 7.05;<br>p < 0.0098 | t(3) = 1.98;<br>p < 0.0934  | t(3) = -2.43;<br>p < 0.0679 | t(3) = -1.51;<br>p < 0.1352 | t(3) = 2.62;<br>p < 0.0601  | t(3) = 34.00;<br>p < 0.0004 | –                            | t(3) = 12.20;<br>p < 0.0033 | t(3) = 1.28;<br>p < 0.1638  | t(3) = -2.00;<br>p < 0.0918 |
| <b>2-phr DPP</b>   | t(3) = 5.51;<br>p < 0.0157 | t(3) = -3.67;<br>p < 0.0335 | t(3) = -7.45;<br>p < 0.0088 | t(3) = -6.86;<br>p < 0.0103 | t(3) = -0.46;<br>p < 0.3450 | t(3) = -2.29;<br>p < 0.0744 | t(3) = -12.20;<br>p < 0.0033 | –                           | t(3) = -0.81;<br>p < 0.2510 | t(3) = -6.61;<br>p < 0.0111 |
| <b>4-phr DPP</b>   | t(3) = 8.68;<br>p < 0.0065 | t(3) = -0.63;<br>p < 0.2957 | t(3) = -2.56;<br>p < 0.0623 | t(3) = -4.16;<br>p < 0.0266 | t(3) = 0.24;<br>p < 0.4148  | t(3) = 0.28;<br>p < 0.4041  | t(3) = -1.28;<br>p < 0.1638  | t(3) = 0.81;<br>p < 0.2510  | –                           | t(3) = -5.89;<br>p < 0.0138 |
| <b>6-phr DPP</b>   | t(3) = 9.59;<br>p < 0.0054 | t(3) = 2.02;<br>p < 0.0907  | t(3) = 0.85;<br>p < 0.2415  | t(3) = 5.20;<br>p < 0.0175  | t(3) = 2.46;<br>p < 0.0667  | t(3) = 4.59;<br>p < 0.0222  | t(3) = 2.00;<br>p < 0.0918   | t(3) = 6.61;<br>p < 0.0111  | t(3) = 5.89;<br>p < 0.0138  | –                           |

**Table S6.** Statistical results based on the t-test for the determination of tensile strength for non-aged NRL gloves containing varying contents of MPP, PPP, and DPP. The values are shown as t(degrees of freedom) = t-value; p < p-value.

|                    | Pristine NR                 | 2-phr MPP                   | 4-phr MPP                   | 6-phr MPP                    | 2-phr PPP                    | 4-phr PPP                    | 6-phr PPP                   | 2-phr DPP                    | 4-phr DPP                   | 6-phr DPP                   |
|--------------------|-----------------------------|-----------------------------|-----------------------------|------------------------------|------------------------------|------------------------------|-----------------------------|------------------------------|-----------------------------|-----------------------------|
| <b>Pristine NR</b> | –                           | t(3) = -1.02;<br>p < 0.2083 | t(3) = -2.79;<br>p < 0.0539 | t(3) = 1.10;<br>p < 0.1922   | t(3) = 2.20;<br>p < 0.0794   | t(3) = -5.91;<br>p < 0.0137  | t(3) = 1.40;<br>p < 0.1485  | t(3) = -6.31;<br>p < 0.0121  | t(3) = -1.22;<br>p < 0.1739 | t(3) = 4.48;<br>p < 0.0232  |
| <b>2-phr MPP</b>   | t(3) = 1.02;<br>p < 0.2083  | –                           | t(3) = -2.76;<br>p < 0.0551 | t(3) = -2.78;<br>p < 0.0543  | t(3) = 2.99;<br>p < 0.0479   | t(3) = -1.70;<br>p < 0.1157  | t(3) = 2.68;<br>p < 0.0580  | t(3) = -2.60;<br>p < 0.0609  | t(3) = 0.28;<br>p < 0.4017  | t(3) = 6.21;<br>p < 0.0125  |
| <b>4-phr MPP</b>   | t(3) = 2.79;<br>p < 0.0539  | t(3) = 2.76;<br>p < 0.0551  | –                           | t(3) = 4.88;<br>p < 0.0197   | t(3) = 4.79;<br>p < 0.0205   | t(3) = -0.60;<br>p < 0.3041  | t(3) = 8.68;<br>p < 0.0065  | t(3) = -1.78;<br>p < 0.1086  | t(3) = 3.52;<br>p < 0.0361  | t(3) = 7.64;<br>p < 0.0084  |
| <b>6-phr MPP</b>   | t(3) = -1.10;<br>p < 0.1922 | t(3) = 2.78;<br>p < 0.0543  | t(3) = -4.88;<br>p < 0.0197 | –                            | t(3) = 3.73;<br>p < 0.0324   | t(3) = -10.38;<br>p < 0.0046 | t(3) = -0.36;<br>p < 0.3782 | t(3) = -17.76;<br>p < 0.0016 | t(3) = -5.05;<br>p < 0.0185 | t(3) = 14.52;<br>p < 0.0024 |
| <b>2-phr PPP</b>   | t(3) = -2.20;<br>p < 0.0794 | t(3) = -2.99;<br>p < 0.0479 | t(3) = -4.79;<br>p < 0.0205 | t(3) = -3.73;<br>p < 0.0324  | –                            | t(3) = -11.96;<br>p < 0.0035 | t(3) = -1.52;<br>p < 0.1339 | t(3) = -22.31;<br>p < 0.0010 | t(3) = -4.61;<br>p < 0.0220 | t(3) = 11.38;<br>p < 0.0038 |
| <b>4-phr PPP</b>   | t(3) = 5.91;<br>p < 0.0137  | t(3) = 1.70;<br>p < 0.1157  | t(3) = 0.60;<br>p < 0.3041  | t(3) = 10.38;<br>p < 0.0046  | t(3) = 11.96;<br>p < 0.0035  | –                            | t(3) = 10.65;<br>p < 0.0043 | t(3) = -6.32;<br>p < 0.0121  | t(3) = 3.00;<br>p < 0.0476  | t(3) = 12.81;<br>p < 0.0030 |
| <b>6-phr PPP</b>   | t(3) = -1.40;<br>p < 0.1485 | t(3) = -2.68;<br>p < 0.0580 | t(3) = -8.68;<br>p < 0.0065 | t(3) = 0.36;<br>p < 0.3782   | t(3) = 1.52;<br>p < 0.1339   | t(3) = -10.65;<br>p < 0.0043 | –                           | t(3) = -9.71;<br>p < 0.0052  | t(3) = -3.83;<br>p < 0.0310 | t(3) = 4.73;<br>p < 0.0209  |
| <b>2-phr DPP</b>   | t(3) = 6.31;<br>p < 0.0121  | t(3) = 2.60;<br>p < 0.0609  | t(3) = 1.78;<br>p < 0.1086  | t(3) = 17.76;<br>p < 0.0016  | t(3) = 22.31;<br>p < 0.0010  | t(3) = 6.32;<br>p < 0.0121   | t(3) = 9.71;<br>p < 0.0052  | –                            | t(3) = 4.57;<br>p < 0.0224  | t(3) = 18.36;<br>p < 0.0015 |
| <b>4-phr DPP</b>   | t(3) = 1.22;<br>p < 0.1739  | t(3) = -0.28;<br>p < 0.4017 | t(3) = -3.52;<br>p < 0.0361 | t(3) = 5.05;<br>p < 0.0185   | t(3) = 4.61;<br>p < 0.0220   | t(3) = -3.00;<br>p < 0.0476  | t(3) = 3.83;<br>p < 0.0310  | t(3) = -4.57;<br>p < 0.0224  | –                           | t(3) = 9.54;<br>p < 0.0054  |
| <b>6-phr DPP</b>   | t(3) = -4.48;<br>p < 0.0232 | t(3) = -6.21;<br>p < 0.0125 | t(3) = -7.64;<br>p < 0.0084 | t(3) = -14.52;<br>p < 0.0024 | t(3) = -11.38;<br>p < 0.0038 | t(3) = -12.81;<br>p < 0.0030 | t(3) = -4.73;<br>p < 0.0209 | t(3) = -18.36;<br>p < 0.0015 | t(3) = -9.54;<br>p < 0.0054 | –                           |

**Table S7.** Statistical results based on the t-test for the determination of tensile modulus for non-aged NRL gloves containing varying contents of MPP, PPP, and DPP. The values are shown as t(degrees of freedom) = t-value; p < p-value.

|                    | Pristine NR                 | 2-phr MPP                   | 4-phr MPP                    | 6-phr MPP                    | 2-phr PPP                   | 4-phr PPP                   | 6-phr PPP                   | 2-phr DPP                   | 4-phr DPP                   | 6-phr DPP                    |
|--------------------|-----------------------------|-----------------------------|------------------------------|------------------------------|-----------------------------|-----------------------------|-----------------------------|-----------------------------|-----------------------------|------------------------------|
| <b>Pristine NR</b> | –                           | t(3) = 1.37;<br>p < 0.1518  | t(3) = -14.58;<br>p < 0.0023 | t(3) = -13.70;<br>p < 0.0026 | t(3) = -7.11;<br>p < 0.0096 | t(3) = -2.55;<br>p < 0.0628 | t(3) = 1.26;<br>p < 0.1680  | t(3) = -3.97;<br>p < 0.0290 | t(3) = -4.16;<br>p < 0.0266 | t(3) = -8.57;<br>p < 0.0067  |
| <b>2-phr MPP</b>   | t(3) = -1.37;<br>p < 0.1518 | –                           | t(3) = -5.87;<br>p < 0.0139  | t(3) = -5.70;<br>p < 0.0147  | t(3) = -6.04;<br>p < 0.0132 | t(3) = -2.85;<br>p < 0.0522 | t(3) = -0.15;<br>p < 0.4467 | t(3) = -2.68;<br>p < 0.0579 | t(3) = -4.45;<br>p < 0.0235 | t(3) = -45.65;<br>p < 0.0002 |
| <b>4-phr MPP</b>   | t(3) = 14.58;<br>p < 0.0023 | t(3) = 5.87;<br>p < 0.0139  | –                            | t(3) = 1.89;<br>p < 0.0997   | t(3) = 4.96;<br>p < 0.0192  | t(3) = 5.43;<br>p < 0.161   | t(3) = 12.14;<br>p < 0.0034 | t(3) = 9.65;<br>p < 0.0053  | t(3) = 0.93;<br>p < 0.2244  | t(3) = -0.80;<br>p < 0.2538  |
| <b>6-phr MPP</b>   | t(3) = 13.70;<br>p < 0.0026 | t(3) = 5.70;<br>p < 0.0147  | t(3) = -1.89;<br>p < 0.0997  | –                            | t(3) = 4.90;<br>p < 0.0196  | t(3) = 5.80;<br>p < 0.0142  | t(3) = 14.53;<br>p < 0.0024 | t(3) = 10.58;<br>p < 0.0044 | t(3) = 0.84;<br>p < 0.2450  | t(3) = -0.98;<br>p < 0.2154  |
| <b>2-phr PPP</b>   | t(3) = 7.11;<br>p < 0.0096  | t(3) = 6.04;<br>p < 0.0132  | t(3) = -4.96;<br>p < 0.0192  | t(3) = -4.90;<br>p < 0.0196  | –                           | t(3) = 1.94;<br>p < 0.0959  | t(3) = 4.60;<br>p < 0.0220  | t(3) = 4.43;<br>p < 0.0237  | t(3) = -2.53;<br>p < 0.0635 | t(3) = -8.18;<br>p < 0.0073  |
| <b>4-phr PPP</b>   | t(3) = 2.55;<br>p < 0.0628  | t(3) = 2.85;<br>p < 0.0522  | t(3) = -5.43;<br>p < 0.161   | t(3) = -5.80;<br>p < 0.0142  | t(3) = -1.94;<br>p < 0.0959 | –                           | t(3) = 5.25;<br>p < 0.0172  | t(3) = 1.17;<br>p < 0.1812  | t(3) = -6.24;<br>p < 0.0123 | t(3) = -6.19;<br>p < 0.0126  |
| <b>6-phr PPP</b>   | t(3) = -1.26;<br>p < 0.1680 | t(3) = 0.15;<br>p < 0.4467  | t(3) = -12.14;<br>p < 0.0034 | t(3) = -14.53;<br>p < 0.0024 | t(3) = -4.60;<br>p < 0.0220 | t(3) = -5.25;<br>p < 0.0172 | –                           | t(3) = -4.60;<br>p < 0.0221 | t(3) = -7.31;<br>p < 0.0091 | t(3) = -6.21;<br>p < 0.00125 |
| <b>2-phr DPP</b>   | t(3) = 3.97;<br>p < 0.0290  | t(3) = 2.68;<br>p < 0.0579  | t(3) = -9.65;<br>p < 0.0053  | t(3) = -10.58;<br>p < 0.0044 | t(3) = -4.43;<br>p < 0.0237 | t(3) = -1.17;<br>p < 0.1812 | t(3) = 4.60;<br>p < 0.0221  | –                           | t(3) = -4.20;<br>p < 0.0261 | t(3) = -6.90;<br>p < 0.0102  |
| <b>4-phr DPP</b>   | t(3) = 4.16;<br>p < 0.0266  | t(3) = 4.45;<br>p < 0.0235  | t(3) = -0.93;<br>p < 0.2244  | t(3) = -0.84;<br>p < 0.2450  | t(3) = 2.53;<br>p < 0.0635  | t(3) = 6.24;<br>p < 0.0123  | t(3) = 7.31;<br>p < 0.0091  | t(3) = 4.20;<br>p < 0.0261  | –                           | t(3) = -1.82;<br>p < 0.1048  |
| <b>6-phr DPP</b>   | t(3) = 8.57;<br>p < 0.0067  | t(3) = 45.65;<br>p < 0.0002 | t(3) = 0.80;<br>p < 0.2538   | t(3) = 0.98;<br>p < 0.2154   | t(3) = 8.18;<br>p < 0.0073  | t(3) = 6.19;<br>p < 0.0126  | t(3) = 6.21;<br>p < 0.00125 | t(3) = 6.90;<br>p < 0.0102  | t(3) = 1.82;<br>p < 0.1048  | –                            |

**Table S8.** Statistical results based on the t-test for the determination of elongation at break for non-aged NRL gloves containing varying contents of MPP, PPP, and DPP. The values are shown as t(degrees of freedom) = t-value; p < p-value.

|                    | Pristine NR                  | 2-phr MPP                   | 4-phr MPP                    | 6-phr MPP                    | 2-phr PPP                    | 4-phr PPP                    | 6-phr PPP                    | 2-phr DPP                    | 4-phr DPP                   | 6-phr DPP                    |
|--------------------|------------------------------|-----------------------------|------------------------------|------------------------------|------------------------------|------------------------------|------------------------------|------------------------------|-----------------------------|------------------------------|
| <b>Pristine NR</b> | –                            | t(3) = -1.86;<br>p < 0.1016 | t(3) = 4.33;<br>p < 0.0247   | t(3) = 3.26;<br>p < 0.0412   | t(3) = 6.30;<br>p < 0.0121   | t(3) = -5.33;<br>p < 0.0167  | t(3) = -1.90;<br>p < 0.0986  | t(3) = -4.76;<br>p < 0.0207  | t(3) = 1.94;<br>p < 0.0962  | t(3) = 20.69;<br>p < 0.0012  |
| <b>2-phr MPP</b>   | t(3) = 1.86;<br>p < 0.1016   | –                           | t(3) = 2.88;<br>p < 0.0511   | t(3) = 3.09;<br>p < 0.0454   | t(3) = 3.36;<br>p < 0.0391   | t(3) = 0.16;<br>p < 0.4443   | t(3) = 0.78;<br>p < 0.2591   | t(3) = 0.29;<br>p < 0.3981   | t(3) = 1.88;<br>p < 0.1001  | t(3) = 7.57;<br>p < 0.0085   |
| <b>4-phr MPP</b>   | t(3) = -4.33;<br>p < 0.0247  | t(3) = -2.88;<br>p < 0.0511 | –                            | t(3) = 2.19;<br>p < 0.0799   | t(3) = 5.65;<br>p < 0.0150   | t(3) = -16.83;<br>p < 0.018  | t(3) = -7.07;<br>p < 0.0097  | t(3) = -12.49;<br>p < 0.0032 | t(3) = -0.74;<br>p < 0.2682 | t(3) = 54.84;<br>p < 0.0002  |
| <b>6-phr MPP</b>   | t(3) = -3.26;<br>p < 0.0412  | t(3) = -3.09;<br>p < 0.0454 | t(3) = -2.19;<br>p < 0.0799  | –                            | t(3) = 2.53;<br>p < 0.0634   | t(3) = -13.38;<br>p < 0.0028 | t(3) = -13.16;<br>p < 0.0029 | t(3) = -10.57;<br>p < 0.0044 | t(3) = -1.45;<br>p < 0.1419 | t(3) = 13.26;<br>p < 0.0028  |
| <b>2-phr PPP</b>   | t(3) = -6.30;<br>p < 0.0121  | t(3) = -3.36;<br>p < 0.0391 | t(3) = -5.65;<br>p < 0.0150  | t(3) = -2.53;<br>p < 0.0634  | –                            | t(3) = -80.79;<br>p < 0.0001 | t(3) = -25.70;<br>p < 0.0008 | t(3) = -76.55;<br>p < 0.0001 | t(3) = -4.28;<br>p < 0.0253 | t(3) = 10.49;<br>p < 0.0045  |
| <b>4-phr PPP</b>   | t(3) = 5.33;<br>p < 0.0167   | t(3) = -0.16;<br>p < 0.4443 | t(3) = 16.83;<br>p < 0.018   | t(3) = 13.38;<br>p < 0.0028  | t(3) = 80.79;<br>p < 0.0001  | –                            | t(3) = 5.25;<br>p < 0.0172   | t(3) = 3.16;<br>p < 0.0436   | t(3) = 6.60;<br>p < 0.0111  | t(3) = 29.03;<br>p < 0.0006  |
| <b>6-phr PPP</b>   | t(3) = 1.90;<br>p < 0.0986   | t(3) = -0.78;<br>p < 0.2591 | t(3) = 7.07;<br>p < 0.0097   | t(3) = 13.16;<br>p < 0.0029  | t(3) = 25.70;<br>p < 0.0008  | t(3) = -5.25;<br>p < 0.0172  | –                            | t(3) = -3.65;<br>p < 0.0337  | t(3) = 3.46;<br>p < 0.0371  | t(3) = 18.04;<br>p < 0.0015  |
| <b>2-phr DPP</b>   | t(3) = 4.76;<br>p < 0.0207   | t(3) = -0.29;<br>p < 0.3981 | t(3) = 12.49;<br>p < 0.0032  | t(3) = 10.57;<br>p < 0.0044  | t(3) = 76.55;<br>p < 0.0001  | t(3) = -3.16;<br>p < 0.0436  | t(3) = 3.65;<br>p < 0.0337   | –                            | t(3) = 7.10;<br>p < 0.0096  | t(3) = -23.96;<br>p < 0.0009 |
| <b>4-phr DPP</b>   | t(3) = -1.94;<br>p < 0.0962  | t(3) = -1.88;<br>p < 0.1001 | t(3) = 0.74;<br>p < 0.2682   | t(3) = 1.45;<br>p < 0.1419   | t(3) = 4.28;<br>p < 0.0253   | t(3) = -6.60;<br>p < 0.0111  | t(3) = -3.46;<br>p < 0.0371  | t(3) = -7.10;<br>p < 0.0096  | –                           | t(3) = 8.70;<br>p < 0.0065   |
| <b>6-phr DPP</b>   | t(3) = -20.69;<br>p < 0.0012 | t(3) = -7.57;<br>p < 0.0085 | t(3) = -54.84;<br>p < 0.0002 | t(3) = -13.26;<br>p < 0.0028 | t(3) = -10.49;<br>p < 0.0045 | t(3) = -29.03;<br>p < 0.0006 | t(3) = -18.04;<br>p < 0.0015 | t(3) = 23.96;<br>p < 0.0009  | t(3) = -8.70;<br>p < 0.0065 | –                            |



**Table S9.** Statistical results based on the t-test for the determination of tensile strength for thermal-aged NRL gloves containing varying contents of MPP. The values are shown as t(degrees of freedom) = t-value; p < p-value.

|                    | <b>Pristine NR</b>          | <b>2-phr MPP</b>             | <b>4-phr MPP</b>             | <b>6-phr MPP</b>            |
|--------------------|-----------------------------|------------------------------|------------------------------|-----------------------------|
| <b>Pristine NR</b> | –                           | t(3) = -15.32;<br>p < 0.0021 | t(3) = -7.54;<br>p < 0.0086  | t(3) = -4.00;<br>p < 0.0285 |
| <b>2-phr MPP</b>   | t(3) = 15.32;<br>p < 0.0021 | –                            | t(3) = 1.14;<br>p < 0.1856   | t(3) = 5.16;<br>p < 0.0178  |
| <b>4-phr MPP</b>   | t(3) = 7.54;<br>p < 0.0086  | t(3) = -1.14;<br>p < 0.1856  | –                            | t(3) = 10.34;<br>p < 0.0046 |
| <b>6-phr MPP</b>   | t(3) = 4.00;<br>p < 0.0285  | t(3) = -5.16;<br>p < 0.0178  | t(3) = -10.34;<br>p < 0.0046 | –                           |

**Table S10.** Statistical results based on the t-test for the determination of tensile strength for gamma-aged NRL gloves containing varying contents of MPP. The values are shown as t(degrees of freedom) = t-value; p < p-value.

|                    | <b>Pristine NR</b>         | <b>2-phr MPP</b>            | <b>4-phr MPP</b>            | <b>6-phr MPP</b>             |
|--------------------|----------------------------|-----------------------------|-----------------------------|------------------------------|
| <b>Pristine NR</b> | –                          | t(3) = -4.21;<br>p < 0.0261 | t(3) = -4.17;<br>p < 0.0265 | t(3) = -5.23;<br>p < 0.0173  |
| <b>2-phr MPP</b>   | t(3) = 4.21;<br>p < 0.0261 | –                           | t(3) = 0.20;<br>p < 0.4306  | t(3) = -4.35;<br>p < 0.0245  |
| <b>4-phr MPP</b>   | t(3) = 4.17;<br>p < 0.0265 | t(3) = -0.20;<br>p < 0.4306 | –                           | t(3) = -11.22;<br>p < 0.0039 |
| <b>6-phr MPP</b>   | t(3) = 5.23;<br>p < 0.0173 | t(3) = 4.35;<br>p < 0.0245  | t(3) = 11.22;<br>p < 0.0039 | –                            |

**Table S11.** Statistical results based on the t-test for the determination of tensile strength for thermal-aged NRL gloves containing varying contents of PPP. The values are shown as t(degrees of freedom) = t-value; p < p-value.

|                    | <b>Pristine NR</b>         | <b>2-phr PPP</b>            | <b>4-phr PPP</b>            | <b>6-phr PPP</b>           |
|--------------------|----------------------------|-----------------------------|-----------------------------|----------------------------|
| <b>Pristine NR</b> | –                          | t(3) = -5.10;<br>p < 0.0182 | t(3) = -1.68;<br>p < 0.1177 | t(3) = 8.34;<br>p < 0.0070 |
| <b>2-phr PPP</b>   | t(3) = 5.10;<br>p < 0.0182 | –                           | t(3) = 2.90;<br>p < 0.0505  | t(3) = 8.46;<br>p < 0.0068 |
| <b>4-phr PPP</b>   | t(3) = 1.68;<br>p < 0.1177 | t(3) = -2.90;<br>p < 0.0505 | –                           | t(3) = 3.80;<br>p < 0.0314 |
| <b>6-phr PPP</b>   | t(3) = -8.34<br>p < 0.0070 | t(3) = -8.46;<br>p < 0.0068 | t(3) = -3.80;<br>p < 0.0314 | –                          |

**Table S12.** Statistical results based on the t-test for the determination of tensile strength for gamma-aged NRL gloves containing varying contents of PPP. The values are shown as t(degrees of freedom) = t-value; p < p-value.

|                    | <b>Pristine NR</b>         | <b>2-phr PPP</b>            | <b>4-phr PPP</b>            | <b>6-phr PPP</b>            |
|--------------------|----------------------------|-----------------------------|-----------------------------|-----------------------------|
| <b>Pristine NR</b> | –                          | t(3) = -6.31;<br>p < 0.0121 | t(3) = -1.95;<br>p < 0.0950 | t(3) = -1.89;<br>p < 0.0999 |
| <b>2-phr PPP</b>   | t(3) = 6.31;<br>p < 0.0121 | –                           | t(3) = 3.69;<br>p < 0.0332  | t(3) = 5.68;<br>p < 0.0148  |
| <b>4-phr PPP</b>   | t(3) = 1.95;<br>p < 0.0950 | t(3) = -3.69;<br>p < 0.0332 | –                           | t(3) = 2.15;<br>p < 0.0820  |
| <b>6-phr PPP</b>   | t(3) = 1.89;<br>p < 0.0999 | t(3) = -5.68;<br>p < 0.0148 | t(3) = -2.15;<br>p < 0.0820 | –                           |

**Table S13.** Statistical results based on the t-test for the determination of tensile strength for thermal-aged NRL gloves containing varying contents of DPP. The values are shown as t(degrees of freedom) = t-value; p < p-value.

|                    | <b>Pristine NR</b>         | <b>2-phr DPP</b>            | <b>4-phr DPP</b>            | <b>6-phr DPP</b>            |
|--------------------|----------------------------|-----------------------------|-----------------------------|-----------------------------|
| <b>Pristine NR</b> | –                          | t(3) = -2.96;<br>p < 0.0489 | t(3) = -0.64;<br>p < 0.2934 | t(3) = -4.61;<br>p < 0.0220 |
| <b>2-phr DPP</b>   | t(3) = 2.96;<br>p < 0.0489 | –                           | t(3) = 3.78;<br>p < 0.0316  | t(3) = 1.84;<br>p < 0.1039  |
| <b>4-phr DPP</b>   | t(3) = 0.64;<br>p < 0.2934 | t(3) = -3.78;<br>p < 0.0316 | –                           | t(3) = -0.46;<br>p < 0.3466 |
| <b>6-phr DPP</b>   | t(3) = 4.61;<br>p < 0.0220 | t(3) = -1.84;<br>p < 0.1039 | t(3) = 0.46;<br>p < 0.3466  | –                           |

**Table S14.** Statistical results based on the t-test for the determination of tensile strength for gamma-aged NRL gloves containing varying contents of DPP. The values are shown as t(degrees of freedom) = t-value; p < p-value.

|                    | <b>Pristine NR</b>          | <b>2-phr DPP</b>            | <b>4-phr DPP</b>             | <b>6-phr DPP</b>            |
|--------------------|-----------------------------|-----------------------------|------------------------------|-----------------------------|
| <b>Pristine NR</b> | –                           | t(3) = 0.08;<br>p < 0.4734  | t(3) = -4.86;<br>p < 0.0199  | t(3) = -1.45;<br>p < 0.1425 |
| <b>2-phr DPP</b>   | t(3) = -0.08;<br>p < 0.4734 | –                           | t(3) = -22.99;<br>p < 0.0009 | t(3) = -2.51;<br>p < 0.0643 |
| <b>4-phr DPP</b>   | t(3) = 4.86;<br>p < 0.0199  | t(3) = 22.99;<br>p < 0.0009 | –                            | t(3) = 4.28;<br>p < 0.0252  |
| <b>6-phr DPP</b>   | t(3) = 1.45;<br>p < 0.1425  | t(3) = 2.51;<br>p < 0.0643  | t(3) = -4.28;<br>p < 0.0252  | –                           |

**Table S15.** Statistical results based on the t-test for the determination of tensile modulus for thermal-aged NRL gloves containing varying contents of MPP. The values are shown as t(degrees of freedom) = t-value; p < p-value.

|                    | <b>Pristine NR</b>          | <b>2-phr MPP</b>           | <b>4-phr MPP</b>            | <b>6-phr MPP</b>            |
|--------------------|-----------------------------|----------------------------|-----------------------------|-----------------------------|
| <b>Pristine NR</b> | –                           | t(3) = 2.93;<br>p < 0.0497 | t(3) = 5.77;<br>p < 0.0144  | t(3) = 0.89;<br>p < 0.2343  |
| <b>2-phr MPP</b>   | t(3) = -2.93;<br>p < 0.0497 | –                          | t(3) = -0.05;<br>p < 0.4823 | t(3) = -2.00;<br>p < 0.0918 |
| <b>4-phr MPP</b>   | t(3) = -5.77;<br>p < 0.0144 | t(3) = 0.05;<br>p < 0.4823 | –                           | t(3) = -7.57;<br>p < 0.0085 |
| <b>6-phr MPP</b>   | t(3) = -0.89;<br>p < 0.2343 | t(3) = 2.00;<br>p < 0.0918 | t(3) = 7.57;<br>p < 0.0085  | –                           |

**Table S16.** Statistical results based on the t-test for the determination of tensile modulus for gamma-aged NRL gloves containing varying contents of MPP. The values are shown as t(degrees of freedom) = t-value; p < p-value.

|                    | <b>Pristine NR</b>         | <b>2-phr MPP</b>            | <b>4-phr MPP</b>           | <b>6-phr MPP</b>            |
|--------------------|----------------------------|-----------------------------|----------------------------|-----------------------------|
| <b>Pristine NR</b> | –                          | t(3) = -3.47;<br>p < 0.0369 | t(3) = -4.82<br>p < 0.0202 | t(3) = -1.89;<br>p < 0.0999 |
| <b>2-phr MPP</b>   | t(3) = 3.47;<br>p < 0.0369 | –                           | t(3) = 2.38;<br>p < 0.0700 | t(3) = 0.54;<br>p < 0.3206  |
| <b>4-phr MPP</b>   | t(3) = 4.82<br>p < 0.0202  | t(3) = -2.38;<br>p < 0.0700 | –                          | t(3) = -0.29;<br>p < 0.4010 |
| <b>6-phr MPP</b>   | t(3) = 1.89;<br>p < 0.0999 | t(3) = -0.54;<br>p < 0.3206 | t(3) = 0.29;<br>p < 0.4010 | –                           |

**Table S17.** Statistical results based on the t-test for the determination of tensile modulus for thermal-aged NRL gloves containing varying contents of PPP. The values are shown as t(degrees of freedom) = t-value; p < p-value.

|                    | <b>Pristine NR</b>          | <b>2-phr PPP</b>            | <b>4-phr PPP</b>           | <b>6-phr PPP</b>            |
|--------------------|-----------------------------|-----------------------------|----------------------------|-----------------------------|
| <b>Pristine NR</b> | –                           | t(3) = 0.92;<br>p < 0.2278  | t(3) = 3.00;<br>p < 0.0476 | t(3) = 2.85;<br>p < 0.0522  |
| <b>2-phr PPP</b>   | t(3) = -0.92;<br>p < 0.2278 | –                           | t(3) = 4.21;<br>p < 0.0260 | t(3) = 4.72;<br>p < 0.0210  |
| <b>4-phr PPP</b>   | t(3) = -3.00;<br>p < 0.0476 | t(3) = -4.21;<br>p < 0.0260 | –                          | t(3) = -3.14;<br>p < 0.0441 |
| <b>6-phr PPP</b>   | t(3) = -2.85;<br>p < 0.0522 | t(3) = -4.72;<br>p < 0.0210 | t(3) = 3.14;<br>p < 0.0441 | –                           |

**Table S18.** Statistical results based on the t-test for the determination of tensile modulus for gamma-aged NRL gloves containing varying contents of PPP. The values are shown as t(degrees of freedom) = t-value; p < p-value.

|                    | <b>Pristine NR</b>         | <b>2-phr PPP</b>            | <b>4-phr PPP</b>            | <b>6-phr PPP</b>            |
|--------------------|----------------------------|-----------------------------|-----------------------------|-----------------------------|
| <b>Pristine NR</b> | –                          | t(3) = -3.47;<br>p < 0.0369 | t(3) = -4.82;<br>p < 0.0202 | t(3) = -1.89;<br>p < 0.0999 |
| <b>2-phr PPP</b>   | t(3) = 3.47;<br>p < 0.0369 | –                           | t(3) = 2.38;<br>p < 0.0700  | t(3) = 0.54;<br>p < 0.3206  |
| <b>4-phr PPP</b>   | t(3) = 4.82;<br>p < 0.0202 | t(3) = -2.38;<br>p < 0.0700 | –                           | t(3) = -0.29;<br>p < 0.4010 |
| <b>6-phr PPP</b>   | t(3) = 1.89;<br>p < 0.0999 | t(3) = -0.54;<br>p < 0.3206 | t(3) = 0.29;<br>p < 0.4010  | –                           |

**Table S19.** Statistical results based on the t-test for the determination of tensile modulus for thermal-aged NRL gloves containing varying contents of DPP. The values are shown as t(degrees of freedom) = t-value; p < p-value.

|                    | <b>Pristine NR</b>           | <b>2-phr DPP</b>            | <b>4-phr DPP</b>             | <b>6-phr DPP</b>             |
|--------------------|------------------------------|-----------------------------|------------------------------|------------------------------|
| <b>Pristine NR</b> | –                            | t(3) = 17.67;<br>p < 0.0016 | t(3) = -3.37;<br>p < 0.0389  | t(3) = -12.74;<br>p < 0.0031 |
| <b>2-phr DPP</b>   | t(3) = -17.67;<br>p < 0.0016 | –                           | t(3) = -11.96;<br>p < 0.0035 | t(3) = -18.32;<br>p < 0.0015 |
| <b>4-phr DPP</b>   | t(3) = 3.37;<br>p < 0.0389   | t(3) = 11.96;<br>p < 0.0035 | –                            | t(3) = -14.38;<br>p < 0.0024 |
| <b>6-phr DPP</b>   | t(3) = 12.74;<br>p < 0.0031  | t(3) = 18.32;<br>p < 0.0015 | t(3) = 14.38;<br>p < 0.0024  | –                            |

**Table S20.** Statistical results based on the t-test for the determination of tensile modulus for gamma-aged NRL gloves containing varying contents of DPP. The values are shown as t(degrees of freedom) = t-value; p < p-value.

|                    | <b>Pristine NR</b>          | <b>2-phr DPP</b>             | <b>4-phr DPP</b>            | <b>6-phr DPP</b>             |
|--------------------|-----------------------------|------------------------------|-----------------------------|------------------------------|
| <b>Pristine NR</b> | –                           | t(3) = -12.13;<br>p < 0.0034 | t(3) = -6.18;<br>p < 0.0126 | t(3) = -46.00;<br>p < 0.0002 |
| <b>2-phr DPP</b>   | t(3) = 12.13;<br>p < 0.0034 | –                            | t(3) = -3.02;<br>p < 0.0472 | t(3) = -77.48;<br>p < 0.0001 |
| <b>4-phr DPP</b>   | t(3) = 6.18;<br>p < 0.0126  | t(3) = 3.02;<br>p < 0.0472   | –                           | t(3) = -5.95;<br>p < 0.0135  |
| <b>6-phr DPP</b>   | t(3) = 46.00;<br>p < 0.0002 | t(3) = 77.48;<br>p < 0.0001  | t(3) = 5.95;<br>p < 0.0135  | –                            |

**Table S21.** Statistical results based on the t-test for the determination of elongation at break for thermal-aged NRL gloves containing varying contents of MPP. The values are shown as t(degrees of freedom) = t-value; p < p-value.

|                    | <b>Pristine NR</b>          | <b>2-phr MPP</b>             | <b>4-phr MPP</b>             | <b>6-phr MPP</b>             |
|--------------------|-----------------------------|------------------------------|------------------------------|------------------------------|
| <b>Pristine NR</b> | –                           | t(3) = -27.01;<br>p < 0.0007 | t(3) = -26.68;<br>p < 0.0007 | t(3) = -57.11;<br>p < 0.0002 |
| <b>2-phr MPP</b>   | t(3) = 27.01;<br>p < 0.0007 | –                            | t(3) = -0.15;<br>p < 0.4487  | t(3) = 7.69;<br>p < 0.0082   |
| <b>4-phr MPP</b>   | t(3) = 26.68;<br>p < 0.0007 | t(3) = 0.15;<br>p < 0.4487   | –                            | t(3) = 9.62;<br>p < 0.0053   |
| <b>6-phr MPP</b>   | t(3) = 57.11;<br>p < 0.0002 | t(3) = -7.69;<br>p < 0.0082  | t(3) = -9.62;<br>p < 0.0053  | –                            |

**Table S22.** Statistical results based on the t-test for the determination of elongation at break for gamma-aged NRL gloves containing varying contents of MPP. The values are shown as t(degrees of freedom) = t-value; p < p-value.

|                    | <b>Pristine NR</b>         | <b>2-phr MPP</b>            | <b>4-phr MPP</b>            | <b>6-phr MPP</b>            |
|--------------------|----------------------------|-----------------------------|-----------------------------|-----------------------------|
| <b>Pristine NR</b> | –                          | t(3) = -3.58;<br>p < 0.0350 | t(3) = -1.86<br>p < 0.1022  | t(3) = -2.25;<br>p < 0.0768 |
| <b>2-phr MPP</b>   | t(3) = 3.58;<br>p < 0.0350 | –                           | t(3) = 1.85;<br>p < 0.1027  | t(3) = 6.54;<br>p < 0.0113  |
| <b>4-phr MPP</b>   | t(3) = 1.86<br>p < 0.1022  | t(3) = -1.85;<br>p < 0.1027 | –                           | t(3) = 0.55;<br>p < 0.3191  |
| <b>6-phr MPP</b>   | t(3) = 2.25;<br>p < 0.0768 | t(3) = -6.54;<br>p < 0.0113 | t(3) = -0.55;<br>p < 0.3191 | –                           |

**Table S23.** Statistical results based on the t-test for the determination of elongation at break for thermal-aged NRL gloves containing varying contents of PPP. The values are shown as t(degrees of freedom) = t-value; p < p-value.

|                    | <b>Pristine NR</b>          | <b>2-phr PPP</b>            | <b>4-phr PPP</b>            | <b>6-phr PPP</b>           |
|--------------------|-----------------------------|-----------------------------|-----------------------------|----------------------------|
| <b>Pristine NR</b> | –                           | t(3) = -5.04;<br>p < 0.0186 | t(3) = -3.44;<br>p < 0.0376 | t(3) = 1.50;<br>p < 0.1360 |
| <b>2-phr PPP</b>   | t(3) = 5.04;<br>p < 0.0186  | –                           | t(3) = 0.37;<br>p < 0.3749  | t(3) = 7.76;<br>p < 0.0081 |
| <b>4-phr PPP</b>   | t(3) = 3.44;<br>p < 0.0376  | t(3) = -0.37;<br>p < 0.3749 | –                           | t(3) = 5.76;<br>p < 0.0144 |
| <b>6-phr PPP</b>   | t(3) = -1.50;<br>p < 0.1360 | t(3) = -7.76;<br>p < 0.0081 | t(3) = -5.76;<br>p < 0.0144 | –                          |

**Table S24.** Statistical results based on the t-test for the determination of elongation at break for gamma-aged NRL gloves containing varying contents of PPP. The values are shown as t(degrees of freedom) = t-value; p < p-value.

|                    | <b>Pristine NR</b>         | <b>2-phr PPP</b>            | <b>4-phr PPP</b>            | <b>6-phr PPP</b>            |
|--------------------|----------------------------|-----------------------------|-----------------------------|-----------------------------|
| <b>Pristine NR</b> | –                          | t(3) = -4.99;<br>p < 0.0189 | t(3) = -1.91;<br>p < 0.0982 | t(3) = -0.92;<br>p < 0.2267 |
| <b>2-phr PPP</b>   | t(3) = 4.99;<br>p < 0.0189 | –                           | t(3) = 0.97;<br>p < 0.2175  | t(3) = 1.28;<br>p < 0.1638  |
| <b>4-phr PPP</b>   | t(3) = 1.91;<br>p < 0.0982 | t(3) = -0.97;<br>p < 0.2175 | –                           | t(3) = 1.53;<br>p < 0.1328  |
| <b>6-phr PPP</b>   | t(3) = 0.92;<br>p < 0.2267 | t(3) = -1.28;<br>p < 0.1638 | t(3) = -1.53;<br>p < 0.1328 | –                           |



**Table S25.** Statistical results based on the t-test for the determination of elongation at break for thermal-aged NRL gloves containing varying contents of DPP. The values are shown as t(degrees of freedom) = t-value; p < p-value.

|                    | <b>Pristine NR</b>          | <b>2-phr DPP</b>             | <b>4-phr DPP</b>            | <b>6-phr DPP</b>           |
|--------------------|-----------------------------|------------------------------|-----------------------------|----------------------------|
| <b>Pristine NR</b> | –                           | t(3) = -6.03;<br>p < 0.0132  | t(3) = 0.83;<br>p < 0.2478  | t(3) = 2.48;<br>p < 0.0658 |
| <b>2-phr DPP</b>   | t(3) = 6.03;<br>p < 0.0132  | –                            | t(3) = 16.68;<br>p < 0.0018 | t(3) = 4.44;<br>p < 0.0235 |
| <b>4-phr DPP</b>   | t(3) = -0.83;<br>p < 0.2478 | t(3) = -16.68;<br>p < 0.0018 | –                           | t(3) = 0.99;<br>p < 0.2136 |
| <b>6-phr DPP</b>   | t(3) = -2.48;<br>p < 0.0658 | t(3) = -4.44;<br>p < 0.0235  | t(3) = -0.99;<br>p < 0.2136 | –                          |

**Table S26.** Statistical results based on the t-test for the determination of elongation at break for gamma-aged NRL gloves containing varying contents of DPP. The values are shown as t(degrees of freedom) = t-value; p < p-value.

|                    | <b>Pristine NR</b>          | <b>2-phr DPP</b>            | <b>4-phr DPP</b>             | <b>6-phr DPP</b>            |
|--------------------|-----------------------------|-----------------------------|------------------------------|-----------------------------|
| <b>Pristine NR</b> | –                           | t(3) = 1.82;<br>p < 0.1049  | t(3) = -1.50;<br>p < 0.1356  | t(3) = 1.66;<br>p < 0.1198  |
| <b>2-phr DPP</b>   | t(3) = -1.82;<br>p < 0.1049 | –                           | t(3) = -13.66;<br>p < 0.0027 | t(3) = 1.15;<br>p < 0.1838  |
| <b>4-phr DPP</b>   | t(3) = 1.50;<br>p < 0.1356  | t(3) = 13.66;<br>p < 0.0027 | –                            | t(3) = 13.30;<br>p < 0.0028 |
| <b>6-phr DPP</b>   | t(3) = -1.66;<br>p < 0.1198 | t(3) = -1.15;<br>p < 0.1838 | t(3) = -13.30;<br>p < 0.0028 | –                           |
